# Supplementary material for: An Ultra-High Performance Liquid Chromatographic-Tandem Mass Spectrometric Method for the Determination of Sinomenine in Human Plasma after Transdermal Delivery of the Zhengqing Fengtongning Injection
Source: MDPI journal article supplement (doi:10.3390/molecules20046454), 2015-04-10
Supplement: s1 [file s1]

## Supplemental Materials

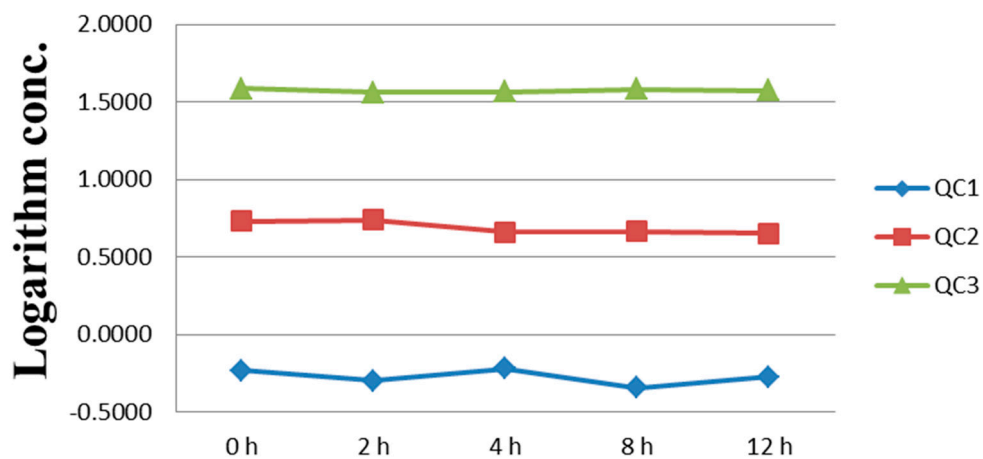

**Figure S1.** The stability of plasma sample under 4 °C. QC1, QC2 and QC3 means the QC samples with concentration of sinomenine were 0.2347, 1.878, and 15.02 ng/mL, respectively.

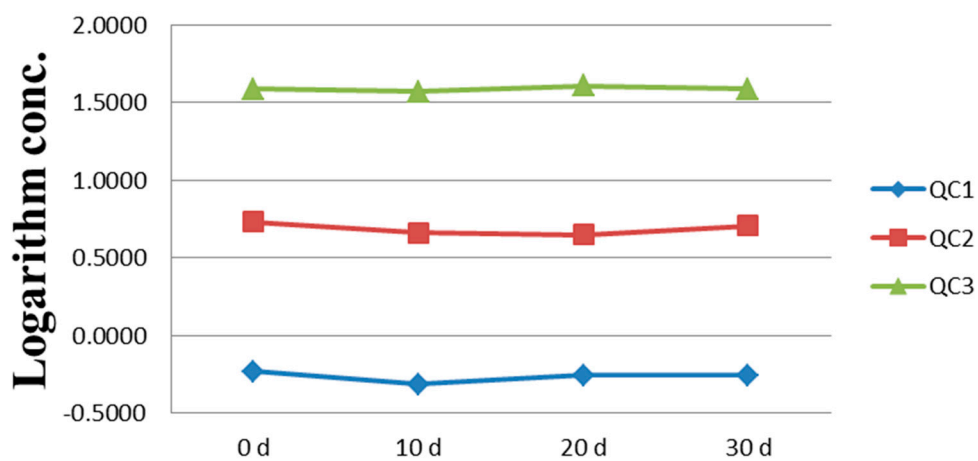

**Figure S2.** The stability of plasma sample under -80 °C.

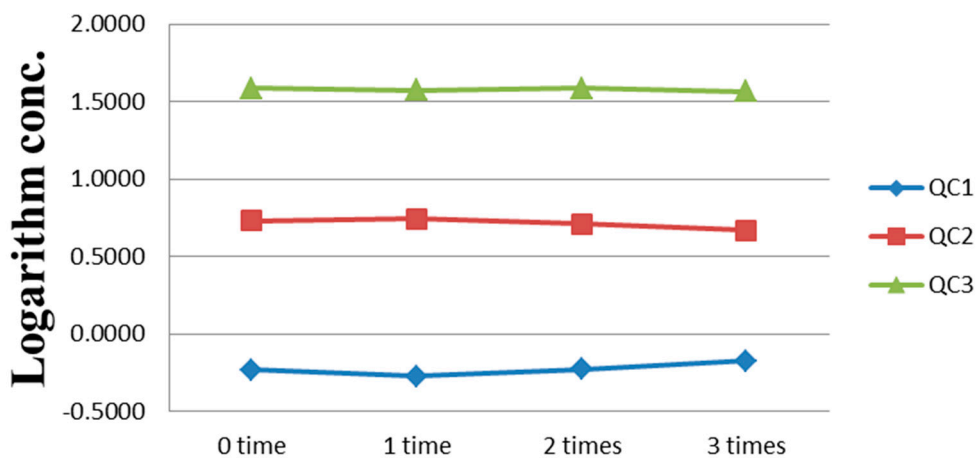

**Figure S3.** The stability of plasma sample in freeze-thaw three times.

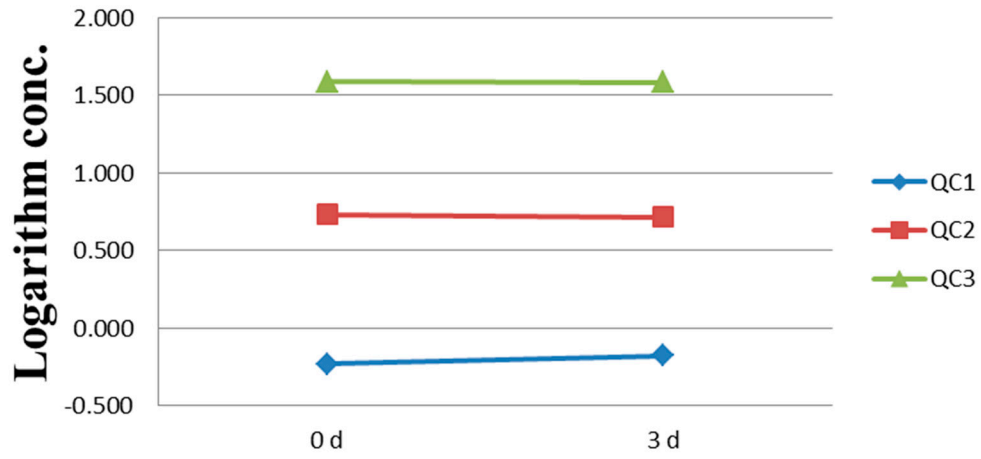

Figure S4. The stability of test sample under 4 °C.

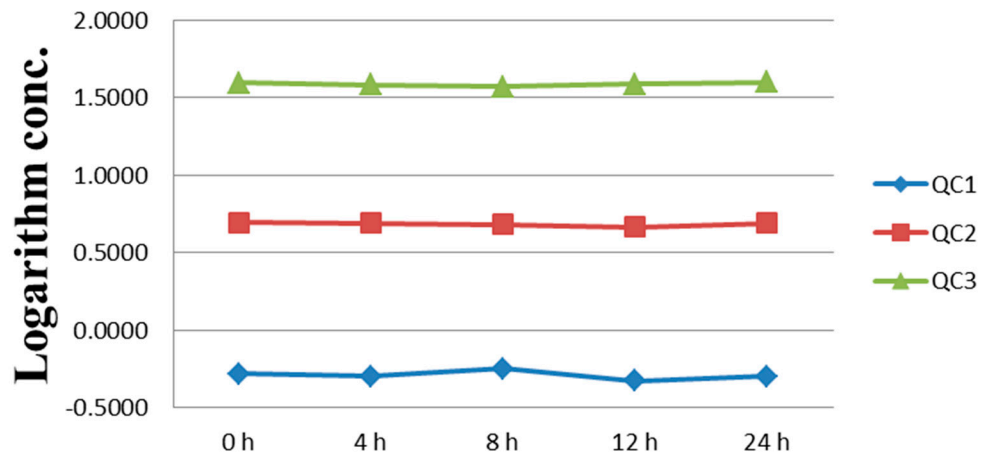

Figure S5. The stability of test sample under 10 °C.
